# Supplementary material for: MiR-183 Regulates ITGB1P Expression and Promotes Invasion of Endometrial Stromal Cells
Source: Hindawi journal article supplement (doi:10.1155/2015/340218), 2015-01-01
Supplement: f1 [file 340218.f1.pdf]

**Suppl 1. Fold change of the differentially expressed genes in miR-183-overexpressing endometrial stromal cells *versus* control cells.**

| Gene<br>Symbol | Fold change | Regulation ([OE]<br>vs [NC]) |
|----------------|-------------|------------------------------|
| AHSA2          | 1.5218405   | down                         |
| AMIGO2         | 1.5111315   | down                         |
| HS2ST1         | 1.5038928   | down                         |
| ITGB1          | 1.7719837   | down                         |
| LHFPL2         | 1.5300908   | down                         |
| PSEN2          | 1.6882111   | down                         |
| UQCRB          | 1.6453439   | down                         |
| VAV3           | 1.5934956   | down                         |
| C6orf150       | 1.5548234   | up                           |
| CBS            | 1.5090706   | up                           |
| CDT1           | 1.6033745   | up                           |
| CHMP4B         | 1.5956801   | up                           |
| GNB2           | 1.529302    | up                           |
| HDGF           | 1.5825031   | up                           |
| HES4           | 1.5046576   | up                           |
| HPCAL1         | 1.5164013   | up                           |
| MYH9           | 1.5872067   | up                           |
| MZT1           | 1.5085506   | up                           |
| PICALM         | 1.7173792   | up                           |
| PPIF           | 1.5092947   | up                           |
| PPP2R5D        | 1.5321019   | up                           |
| HYOU1          | 1.7329035   | up                           |
| PTPRA          | 2.0059988   | up                           |
| PTPRH          | 1.5089976   | up                           |
| SHC1           | 1.5337036   | up                           |
| TUBB           | 1.5212591   | up                           |
| VPS35          | 1.8287842   | up                           |
